# Supplementary material for: Synthesis of a tube-like tetra-bipyridyl, tetra-ethylacetato-calix[4]arene in 1,3-alternate conformation and the unexpected crystal structure of its [bpy(CoCl2)]3-[bpy(CoCl2)(H2O)] complex
Source: Royal Society of Chemistry journal article supplement (doi:10.1039/d4nj02476a), 2024-01-01
Supplement: d4nj02476a1.pdf [file d4nj02476a1.pdf]

Electronic Supplementary Informations

**Synthesis of a tube-like tetra-bipyridyl, tetra-ethylacetato-calix[4]arene in 1,3-alternate conformation and the unexpected crystal structure of its  $[\text{bpy}(\text{CoCl}_2)]_3\text{-}[\text{bpy}(\text{CoCl}_2)(\text{H}_2\text{O})]$  complex†**

Maxime Mourer,<sup>a</sup> Younes Bouizi,<sup>c</sup> Sébastien Leclerc,<sup>d</sup> Bernard Malaman,<sup>b</sup> Jean-Bernard Regnouf de Vains<sup>a,\*</sup>.

<sup>a</sup> L2CM, UMR 7053 CNRS, Université de Lorraine.

<sup>b</sup> UL, UMR 7498, Université de Lorraine.

<sup>c</sup> CRM2, UMR 7036 CNRS, Université de Lorraine

<sup>d</sup> LEMTA, UMR 7563 CNRS, Université de Lorraine

† Supplementary Information available: Crystallographic data CCDC 2357976

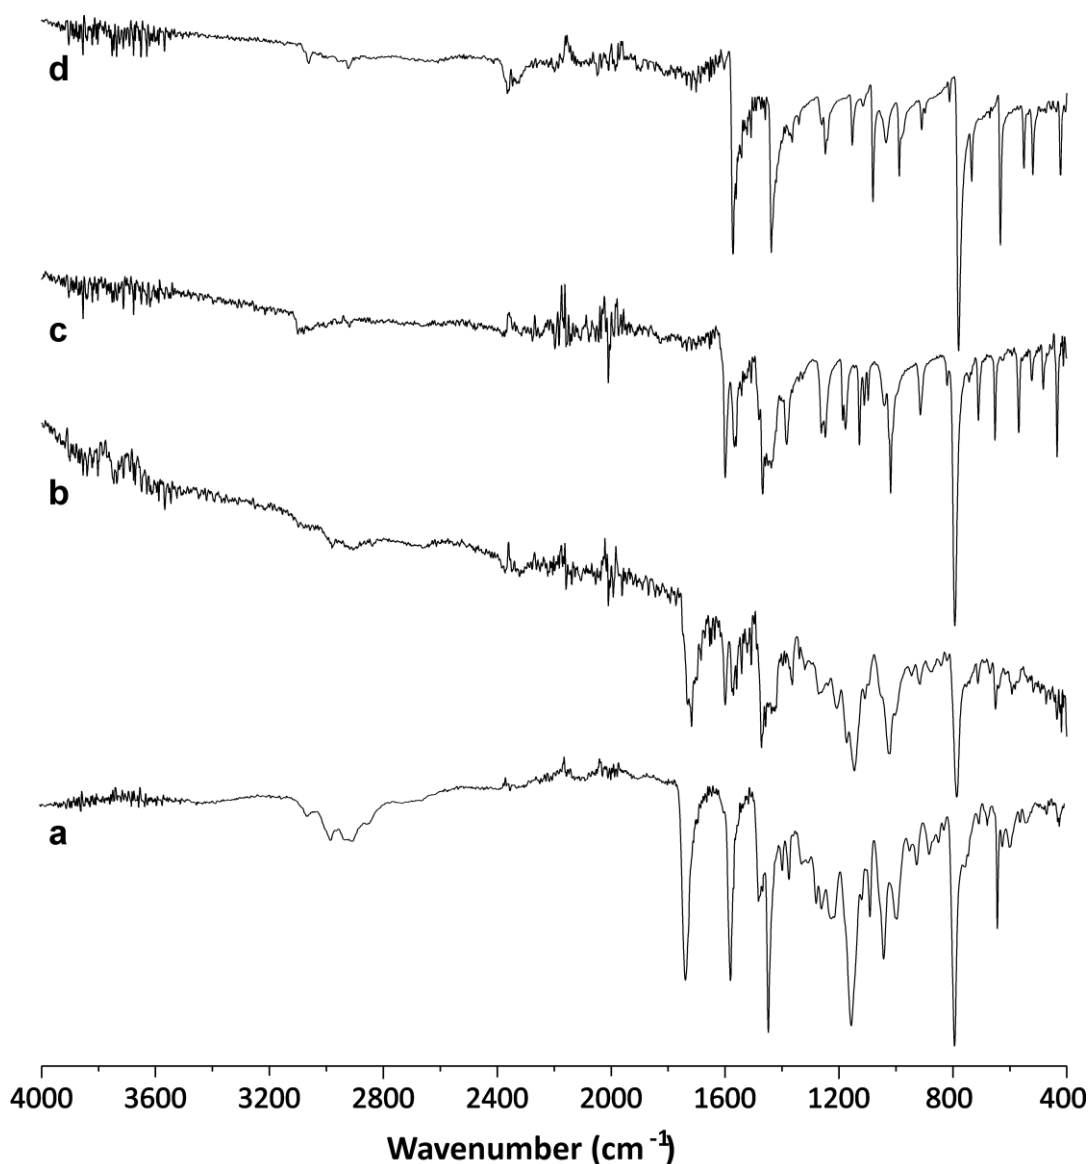

**Figure ESI 1:** 4000-400 cm<sup>-1</sup> FTIR (ATR mode) spectra of (a) ligand **2**, (b) crystals of tetranuclear complex **3**, (c) microcrystalline  $\text{dmbp}(\text{CoCl}_2)$  complex **4** and (d) 6,6'-dimethyl-2,2'-bipyridine (dmbp).

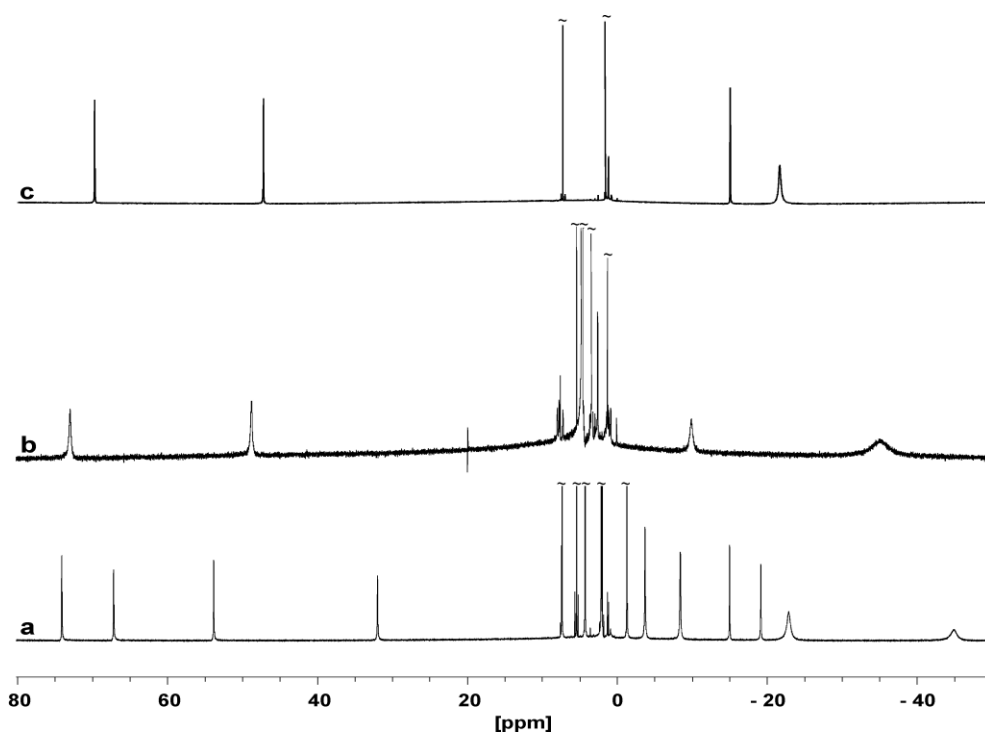

Figure ESI 2:  $^1\text{H}$ -NMR Spectra of a) complex **3** in  $\text{CD}_3\text{CN} + \text{CD}_2\text{Cl}_2$ , b) complex **4** in  $\text{CD}_3\text{OD} + \text{CDCl}_3$ , c) complex **4** in  $\text{CDCl}_3$ . (400 MHz, rt)

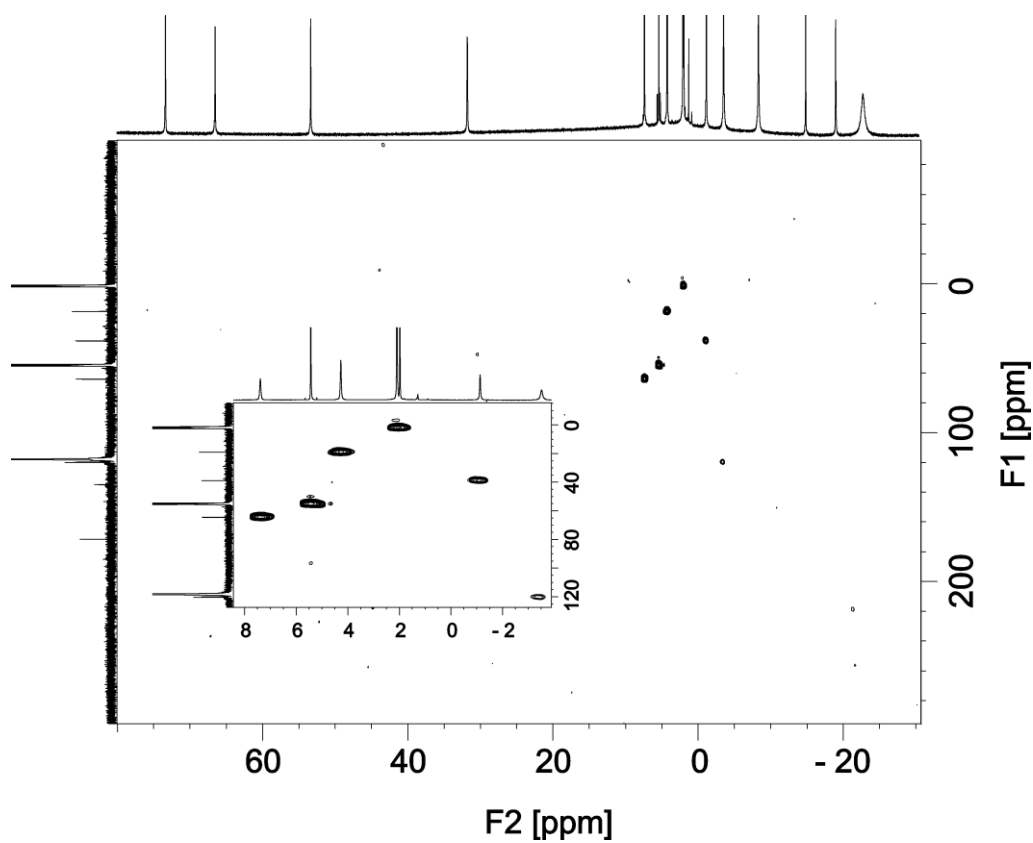

Figure ESI 3:  $^1\text{H}$ ,  $^{13}\text{C}$ -HSQC NMR Spectrum of complex **3** in  $\text{CD}_3\text{CN} + \text{CD}_2\text{Cl}_2$ .

**Table ESI 1.** Selected geometric parameters within calixarene platform in complex **3**.

| Ar-CH <sub>2</sub> -AR angles [°] |         | Ar-CH <sub>2</sub> -AR torsion angles [°] |         |
|-----------------------------------|---------|-------------------------------------------|---------|
| C610-C619-C616                    | 88.9(1) | C610-C619-C616-C622                       | -1.1(1) |
| C619-C616-C622                    | 90.8(1) | C619-C616-C622-C610                       | 1.1(1)  |
| C616-C622-C610                    | 88.4(1) | C616-C622-C610-C619                       | -1.1(1) |
| C622-C610-C619                    | 91.9(1) | C622-C610-C619-C616                       | 1.1(1)  |

  

| Ar-CH <sub>2</sub> -AR distances [Å] | Phenyl rings parallelity: C <sub>ortho</sub> -C <sub>meta</sub> distances [Å] |                       |                       |           |         |
|--------------------------------------|-------------------------------------------------------------------------------|-----------------------|-----------------------|-----------|---------|
| C610-C619                            | 5.055(9)                                                                      | <b>Phenyl Co1-Co3</b> | <b>Phenyl Co2-Co4</b> |           |         |
| C619-C616                            | 5.066(8)                                                                      | C518-C623             | 5.337(8)              | C620-C611 | 5.40(1) |
| C616-C622                            | 5.121(9)                                                                      | C612-C630             | 5.304(8)              | C624-C617 | 5.33(1) |
| C622-C610                            | 5.043(8)                                                                      | C621-C626             | 5.515(8)              | C517-C627 | 5.68(1) |
| C619-C622                            | 7.25(1)                                                                       | C515-C629             | 5.446(8)              | C613-C615 | 5.55(1) |
| C610-C616                            | 7.087(7)                                                                      |                       |                       |           |         |

**Table ESI 2:** Selected geometric parameters around the cobalt(II) atoms in complex **3**.

| Inter-cobalt distances [Å] |           |         |           |
|----------------------------|-----------|---------|-----------|
| Co1-Co2                    | 10.793(2) | Co2-Co3 | 10.379(2) |
| Co1-Co3                    | 13.545(2) | Co2-Co4 | 13.558(2) |
| Co1-Co4                    | 11.777(2) | Co4-Co3 | 11.067(2) |

  

| Angles in the cobalt quadrangle [°] |          |             |          |
|-------------------------------------|----------|-------------|----------|
| Co1-Co4-Co3                         | 72.65(1) | Co2-Co1-Co4 | 73.70(1) |
| Co1-Co2-Co3                         | 79.52(1) | Co2-Co3-Co4 | 78.35(1) |

  

| Interplane angle [°]       |                             |                    |  |
|----------------------------|-----------------------------|--------------------|--|
| <b>Along Co2/Co4 axis:</b> | (Co2-Co1-Co4)/(Co2-Co3-Co4) | 104.5 <sup>a</sup> |  |
| <b>Along Co1-Co3 axis:</b> | (Co1-Co4-Co3)/(Co1-Co2-Co3) | 102.5 <sup>a</sup> |  |

a: esd not available

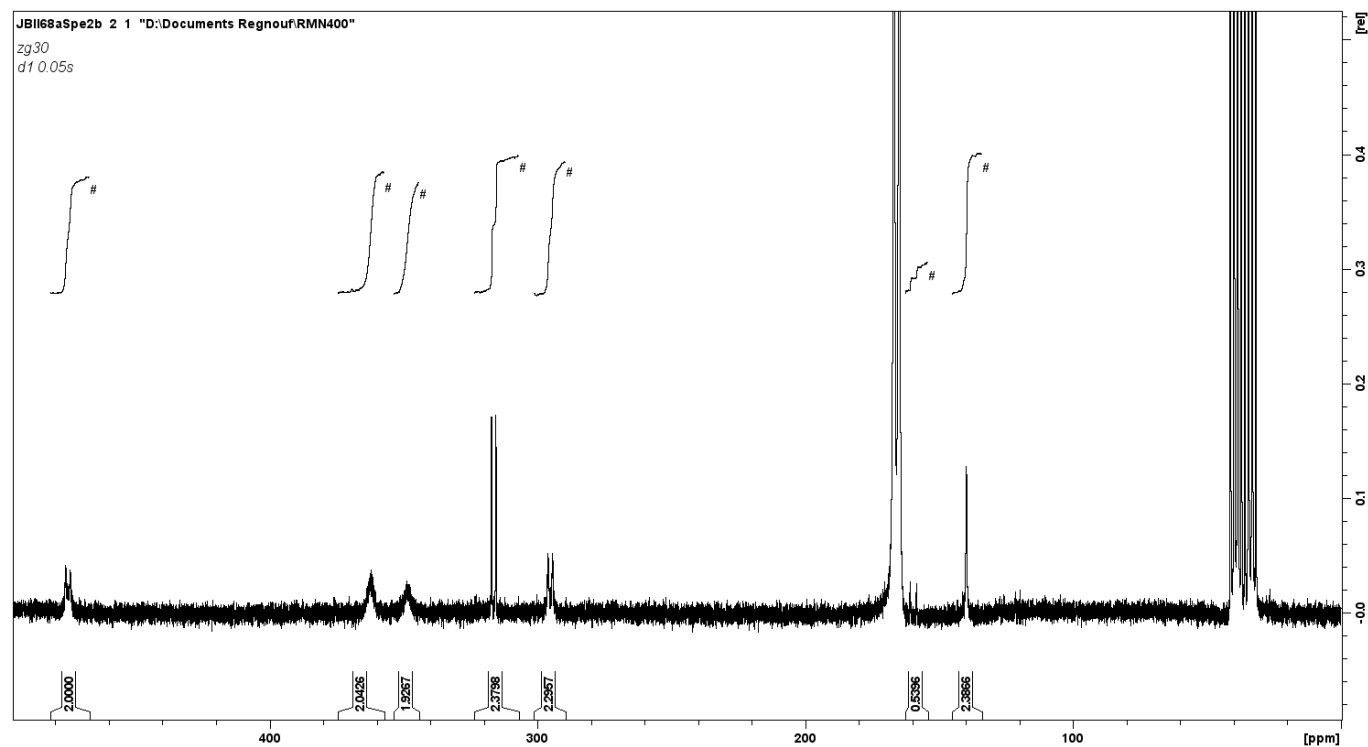**Figure ESI 4:** <sup>13</sup>C-NMR Spectrum of complex **4** in (*H*)DMF (500-0 ppm; 100 Mhz, rt).

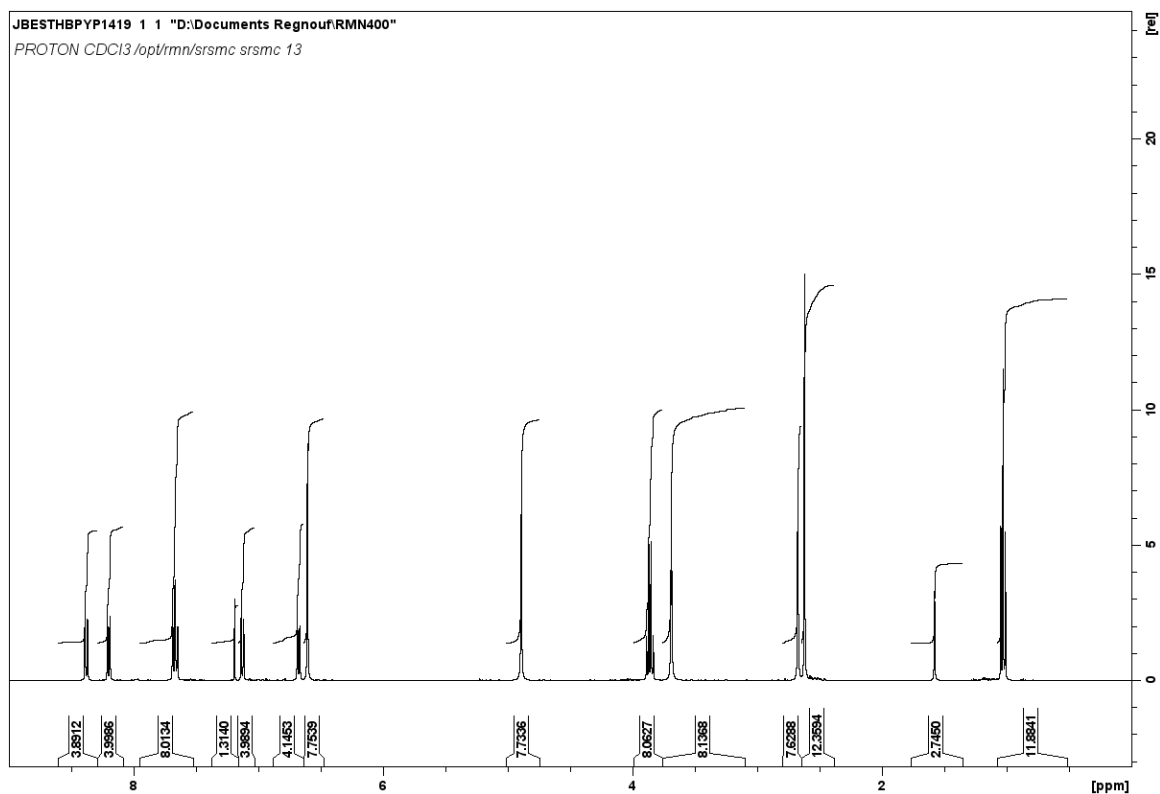

Figure ESI 5:  $^1\text{H}$ -NMR Spectrum of ligand **2** in  $\text{CDCl}_3$  (400 Mhz, rt).

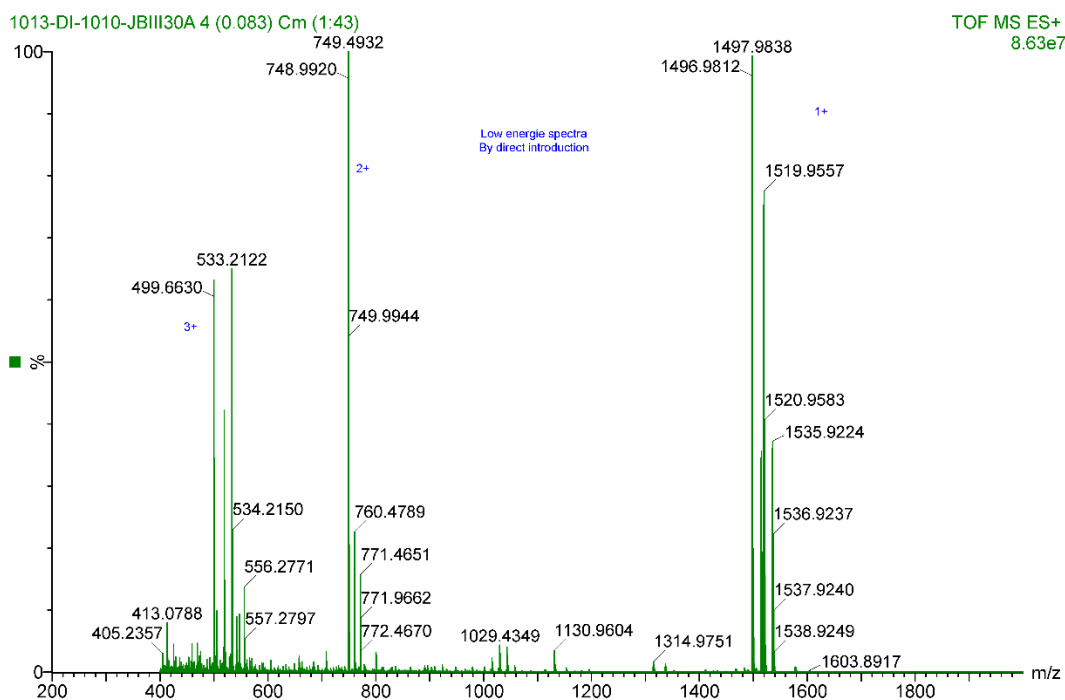

Figure ESI 6: ES-MS positive mode Mass spectrum of complex **3**; direct introduction.

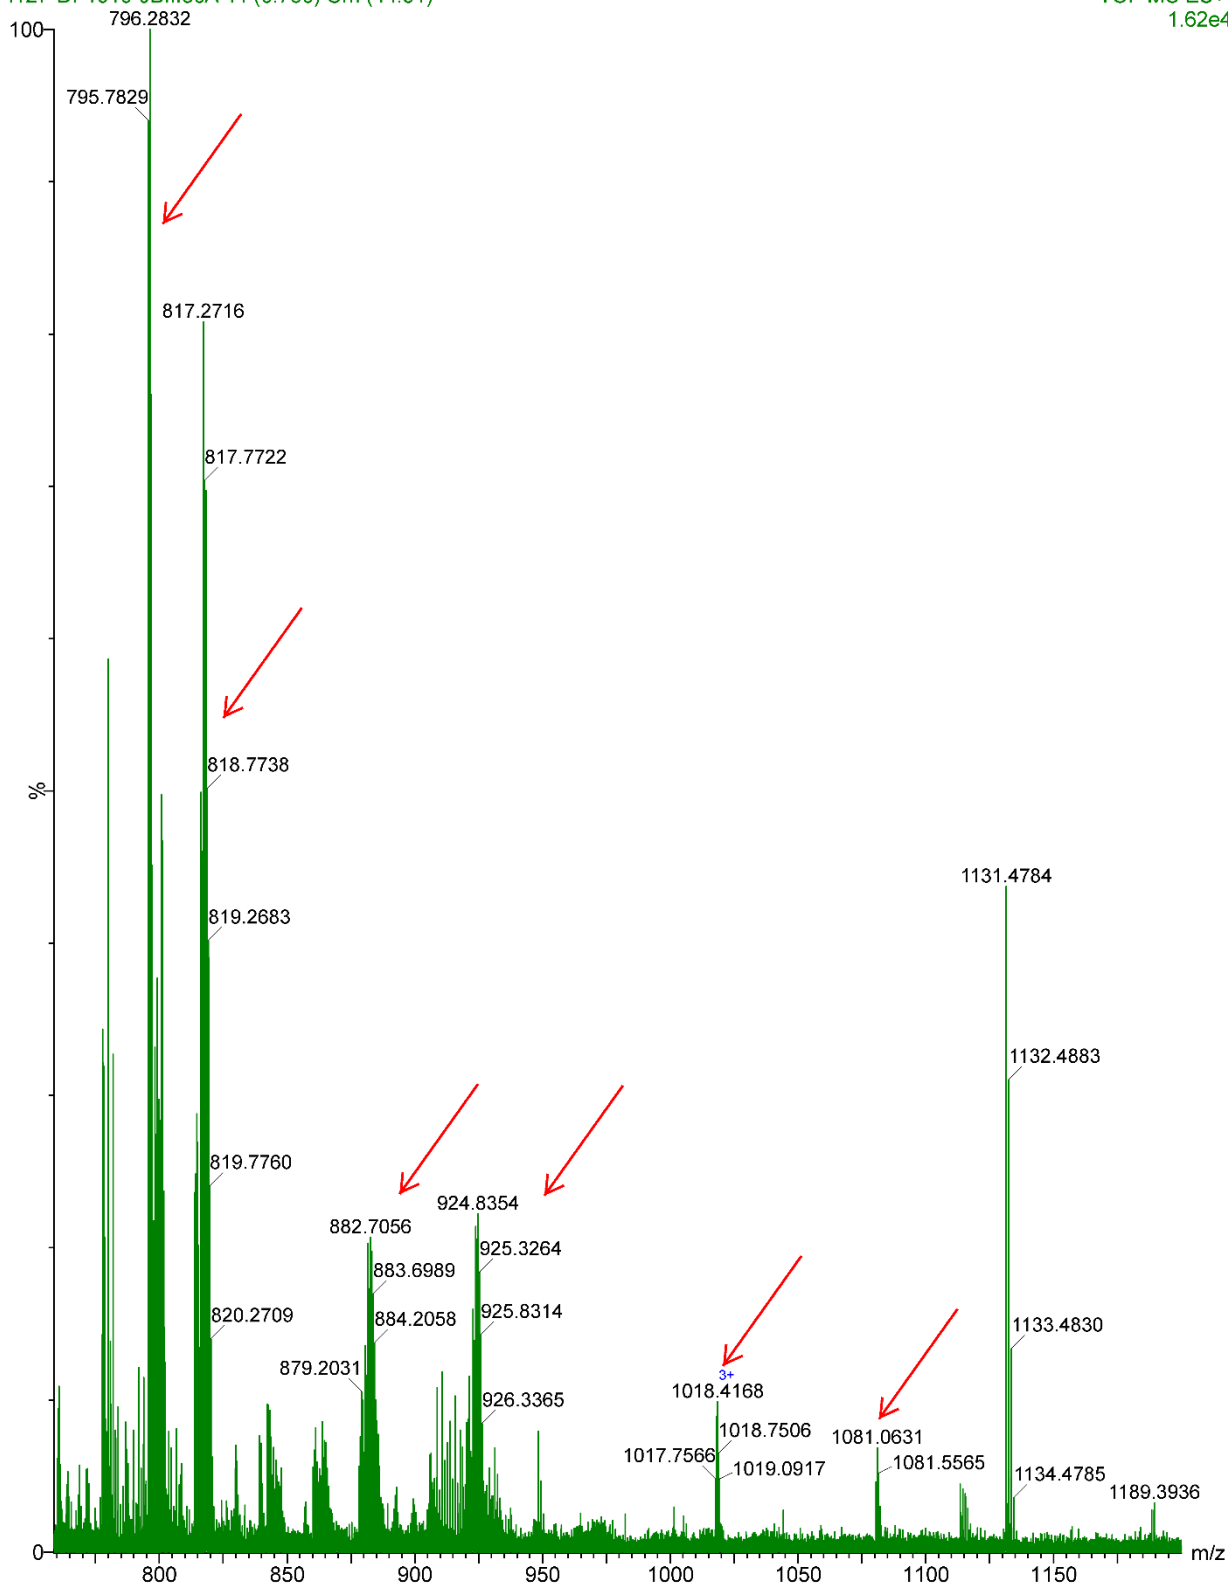

Figure ESI 7: ES-MS positive mode Mass spectrum of complex 3; direct introduction.
